# Supplementary material
Source: PubMed Central journal article supplement (PMC3231774)
Supplement: supp_139.1.129_DEV067702TableS2.pdf [file supp_139.1.129_DEV067702TableS2.pdf]

**Table S2. Numbers of early donor chimaeras and early donor progeny treated with FGF4 or FGF-signalling pathway inhibitors (2i)**

| Type of treatment of early donor chimaeras | Total number of GFP-N donor chimaeras | Total number of GFP-H donor chimaeras | Total number of GFP-N donor progeny | Total number of GFP-H donor progeny |
|--------------------------------------------|---------------------------------------|---------------------------------------|-------------------------------------|-------------------------------------|
| FGF                                        | 20                                    | 1                                     | 91                                  | 5                                   |
| 2i                                         | 17                                    | 8                                     | 69                                  | 37                                  |
| None (control)                             | 22                                    | 18                                    | 105                                 | 76                                  |
