# Supplementary material
Source: PubMed Central journal article supplement (PMC3231774)

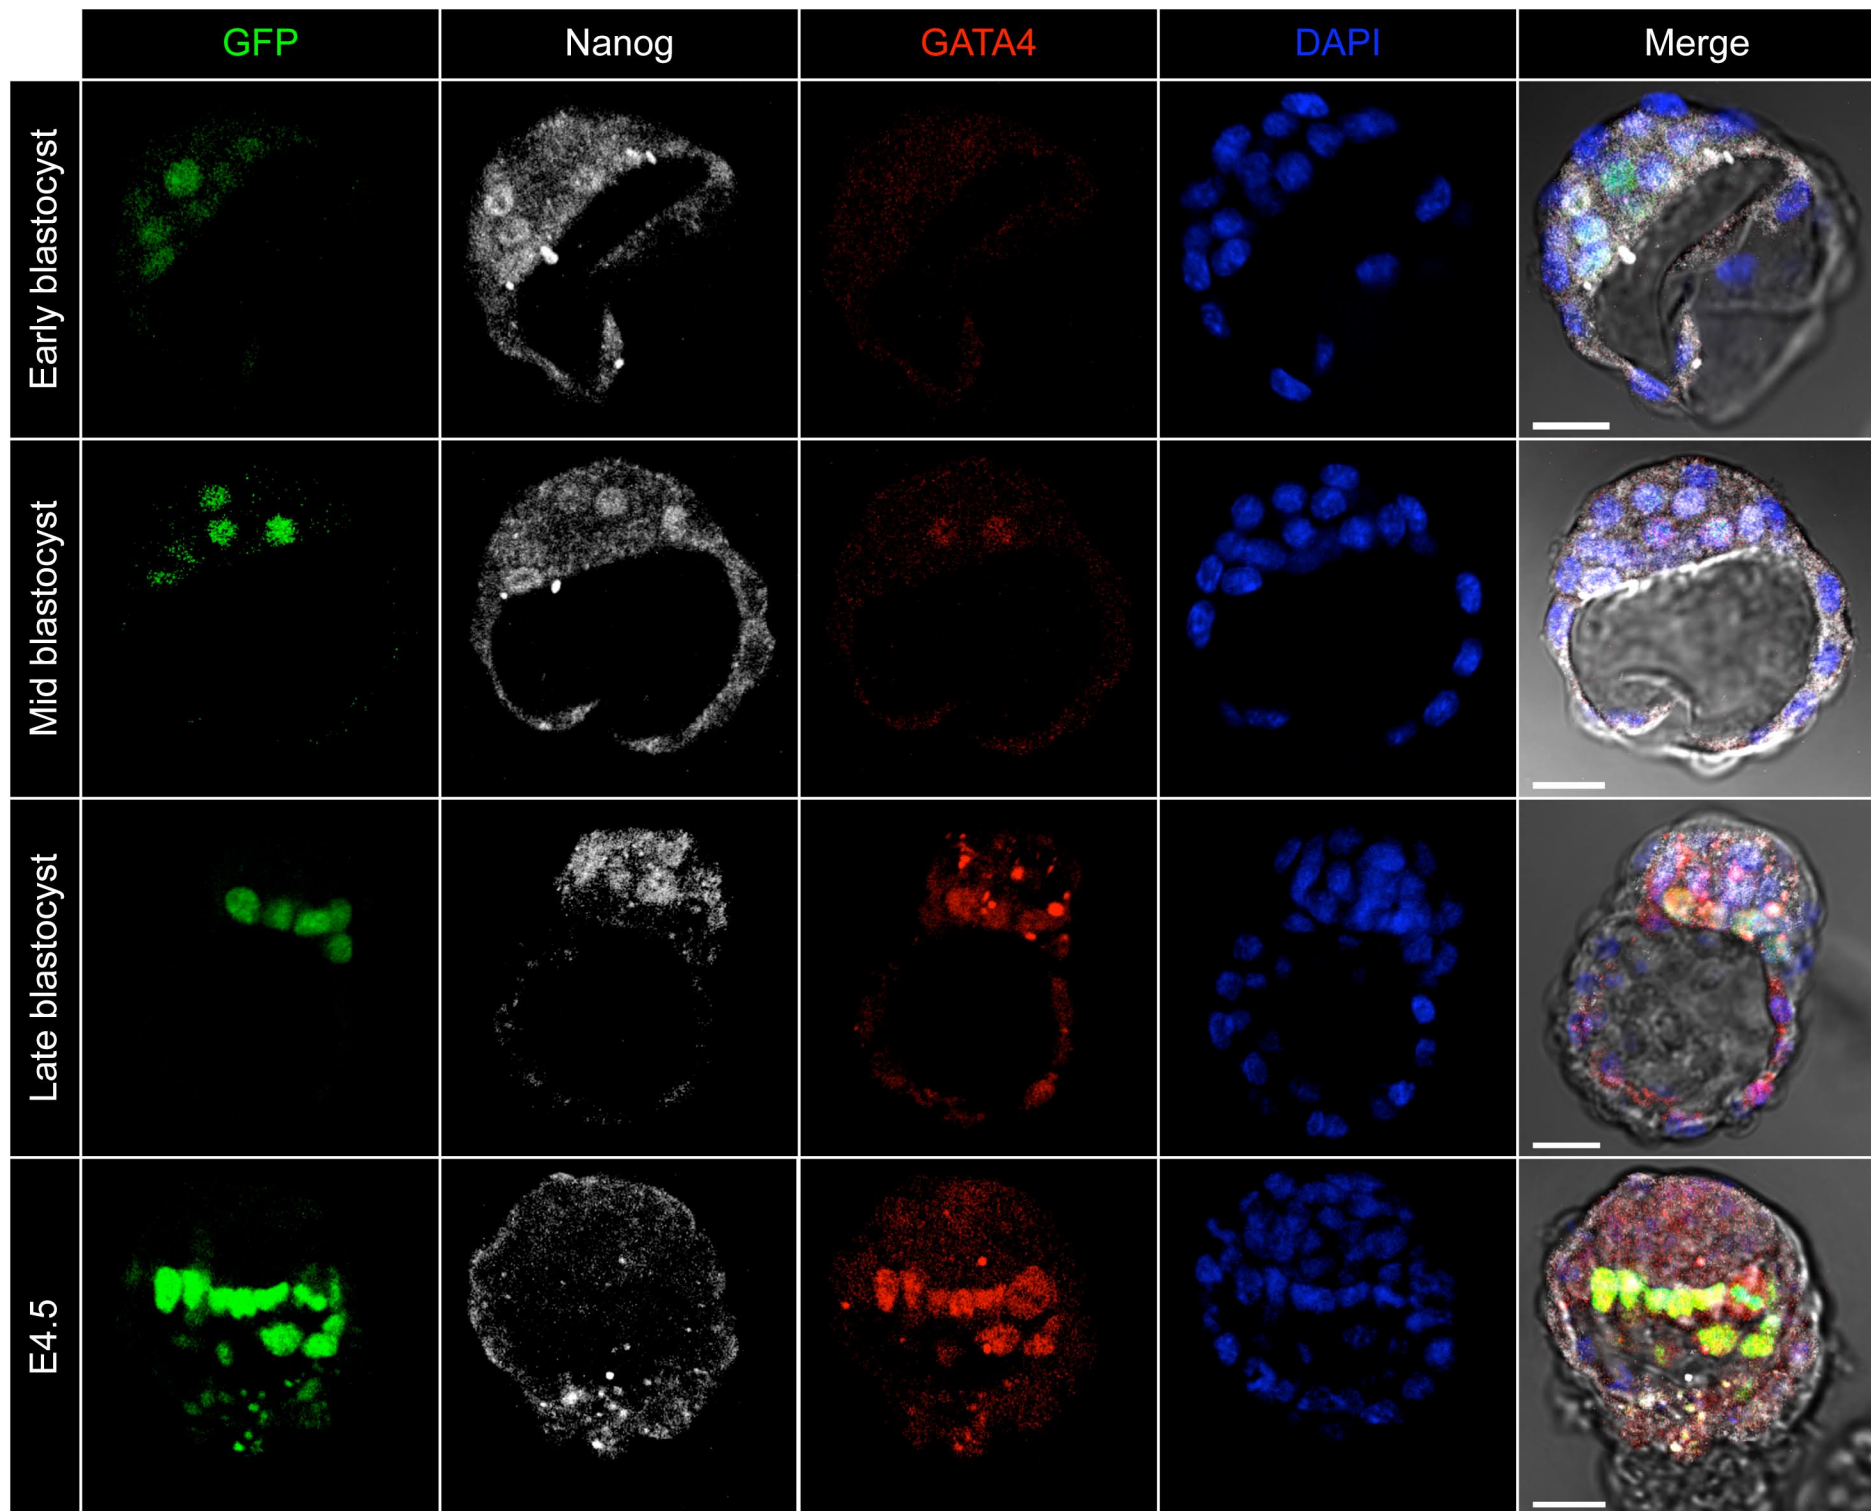

Supplement: supp_139.1.129_DEV067702FigS3.pdf [file supp_139.1.129_DEV067702FigS3.pdf]
